# Supplementary material for: A Genome-Wide Identification and Comparative Analysis of the Heavy-Metal-Associated Gene Family in Cucurbitaceae Species and Their Role in Cucurbita pepo under Arsenic Stress
Source: MDPI journal article supplement (doi:10.3390/genes14101877), 2023-09-27
Supplement: s1 [file s1]

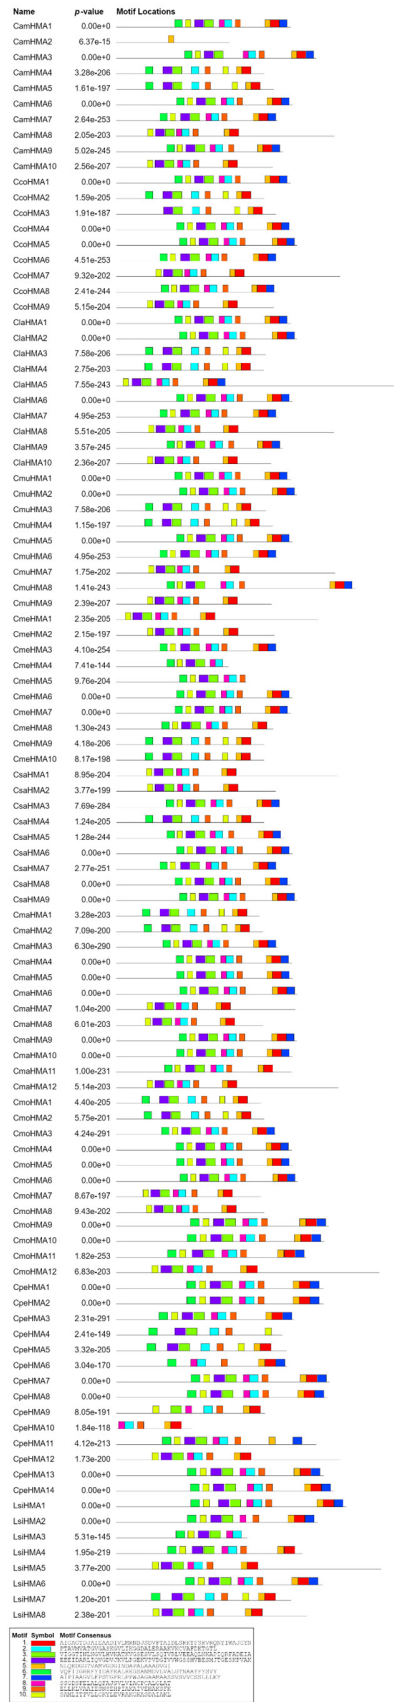

**Figure S1.** Position of the ten common motifs in protein sequences of Cucurbits. Sequence name is shown in the left side of each sequence and the legend of each motif with the typed sequence is presented below all sequences.
