# Supplementary material for: A Genome-Wide Identification and Comparative Analysis of the Heavy-Metal-Associated Gene Family in Cucurbitaceae Species and Their Role in Cucurbita pepo under Arsenic Stress
Source: Genes (Basel). 2023 Sep 27;14(10):1877. doi: 10.3390/genes14101877 (PMC10606463; doi:10.3390/genes14101877)
Supplement: Supplementary file 1 [file genes-14-01877-s001.zip › Supplementary Tables.xlsx]

## Sheet: Table S1
Table S1. Primer sequences of selected CpeHMA genes evaluated by RTqPCR under Arsenic stress
Gene	Primer name	Sequence
CpeHMA2	03530-UTR-F1	GGCAACGAATCAGGAGAACG
	03530-UTR-R1	AGATAGCGGATTTGAGCCC
CpeHMA3	11630-F	AGAAGTAGCGAAGGTAGTGCTT
	11630-R	GCCTACCTACAACCAAGGCT
CpeHMA5	11960-F	CCATCCGAACTGCATCGTCA
	11960-R	CCCCTAAACATTCAGAGCATACC
CpeHMA6	2620-F	CATGCCCCCAAAGAACCTCA
	2620-R	CCACTTGCGCTGCTAAAAACA
CpeHMA8	10980-UTR-F1	CTCCCTTTTTCATCTACGCAAT
	10980-UTR-R1	ACATGCCAAGGACCAGAAA
CpeHMA10	6250-F	CTTCATTGGGTTTCGAGCAT
	6250-R	CAATCTTCCCACGAACACCT
CpeHMA11	05090-F1	AAGATGCGTTCGCGGTGGTGA
	05090-R1	CGAAACGCAACGCAAACGAC
CpeHMA12	6320-F	GTGAAGGCTGGTGAGGACAT
	6320-R	AGCCATTTTAGCCACCACAC
CpeHMA14	5470-F	GGTTGGTGGTAAAGGTTGCG
	5470-R	AGTGTCGGGAAGCGTGTATG

## Sheet: Table S2
Table S2. Basic information on the HMA gene family in ten Cucurbit species
Species	Gene	ID	HMA clade	Chromosome	Chromosomal position		Strand	CDS length (bp)	Number of exons	Protein properties				Domains
					Start	End				Size (aa)	MW(Da)	pI	GRAVY
Citrullus amarus	CamHMA1	CaUC01G002870.1	Ag/Cu	1	2973753	2981265	-	2916	6	971	105482	6.08	0.181	HMA:HMA:HMA:E1-E2_ATPase:Hydrolase
	CamHMA2	CaUC01G013810.1	Zn/Co/Cd/Pb	1	26764728	26772314	+	1890	14	629	69500	7.98	0.181	E1-E2_ATPase:Hydrolase
	CamHMA3	CaUC01G025400.1	Ag/Cu	1	37236253	37248255	-	3345	11	1114	119566	5.31	0.282	HMA:HMA:E1-E2_ATPase:Hydrolase
	CamHMA4	CaUC02G034010.1	Zn/Co/Cd/Pb	2	10655931	10666978	+	2472	13	823	88466	8.31	0.112	E1-E2_ATPase:Hydrolase
	CamHMA5	CaUC02G034540.1	Zn/Co/Cd/Pb	2	12057143	12082688	-	2631	15	876	94549	7.29	0.067	E1-E2_ATPase:Hydrolase
	CamHMA6	CaUC04G070560.1	Ag/Cu	4	17759966	17765317	+	2946	6	981	106363	6.13	0.178	HMA:HMA:HMA:E1-E2_ATPase:Hydrolase
	CamHMA7	CaUC05G095180.1	Ag/Cu	5	25875996	25886091	+	2697	17	898	95895	5.78	0.169	HMA:E1-E2_ATPase:Hydrolase
	CamHMA8	CaUC06G120200.1	Zn/Co/Cd/Pb	6	25243620	25250678	+	3645	9	1214	131279	6.93	-0.284	E1-E2_ATPase:Hydrolase
	CamHMA9	CaUC10G187300.1	Ag/Cu	10	17771317	17795408	-	2787	17	928	98316	8.64	0.142	HMA:E1-E2_ATPase:Hydrolase
	CamHMA10	CaUC11G207770.1	Zn/Co/Cd/Pb	11	8436104	8444587	+	2613	9	870	95176	7.94	-0.071	HMA:E1-E2_ATPase:Hydrolase
Citrullus colocynthis	CcoHMA1	CcUC01G002970.1	Ag/Cu	1	2833412	2840751	-	2916	6	971	105441	5.93828	0.185788	HMA:HMA:HMA:E1-E2_ATPase:Hydrolase
	CcoHMA2	CcUC02G025010.1	Zn/Co/Cd/Pb	2	9163667	9172692	+	2472	13	823	88421	7.83911	0.10243	E1-E2_ATPase:Hydrolase
	CcoHMA3	CcUC02G025640.1	Zn/Co/Cd/Pb	2	10496446	10523694	-	2670	14	889	96136.9	6.9807	0.135996	E1-E2_ATPase:Hydrolase
	CcoHMA4	CcUC04G062780.1	Ag/Cu	4	17778924	17784815	+	2946	6	981	106518	6.35366	0.169317	HMA:HMA:HMA:E1-E2_ATPase:Hydrolase
	CcoHMA5	CcUC04G080470.1	Ag/Cu	4	34621728	34633212	-	3024	9	1007	108131	5.11479	0.313307	HMA:HMA:E1-E2_ATPase:Hydrolase
	CcoHMA6	CcUC05G097660.1	Ag/Cu	5	25671386	25681417	+	2697	17	898	96119.2	6.05747	0.161915	HMA:E1-E2_ATPase:Hydrolase
	CcoHMA7	CcUC06G123480.1	Zn/Co/Cd/Pb	6	25937621	25944738	+	3744	10	1247	134937	7.35544	-0.272975	E1-E2_ATPase:Hydrolase
	CcoHMA8	CcUC10G194430.1	Ag/Cu	10	17690463	17720303	-	2691	16	896	95308.4	8.84314	0.109598	E1-E2_ATPase:Hydrolase
	CcoHMA9	CcUC11G219400.1	Zn/Co/Cd/Pb	11	22895200	22905431	-	2631	9	876	95846.8	8.04586	-0.0757991	E1-E2_ATPase:Hydrolase
Citrullus lanatus	ClaHMA1	Cla97C01G002900.1	Ag/Cu	1	2653171	2660643	+	2916	6	971	105474	6.21	0.18	HMA:HMA:HMA:E1-E2_ATPase:Hydrolase
	ClaHMA2	Cla97C01G025730.1	Ag/Cu	1	36535666	36546376	-	3024	9	1007	108152	5.11	0.311	HMA:HMA:E1-E2_ATPase:Hydrolase
	ClaHMA3	Cla97C02G034280.1	Zn/Co/Cd/Pb	2	8442960	8451722	+	2502	13	833	89498.4	8.17	0.109	E1-E2_ATPase superfamily:Hydrolase
	ClaHMA4	Cla97C02G034790.1	Zn/Co/Cd/Pb	2	9710809	9735663	-	2466	13	871	93878.3	7.25	0.081	E1-E2_ATPase:Hydrolase
	ClaHMA5	Cla97C02G037990.1	Ag/Cu	2	25137101	25171933	+	3660	3	1139	124095	6.1	0.055	E1-E2_ATPase:Hydrolase
	ClaHMA6	Cla97C04G071210.1	Ag/Cu	4	17162653	17168083	+	2946	6	981	106321	6.03	0.188	HMA:HMA:HMA:E1-E2_ATPase:Hydrolase
	ClaHMA7	Cla97C05G096740.1	Ag/Cu	5	25848339	25857296	+	2697	17	898	96012.1	6	0.166	HMA:E1-E2_ATPase:Hydrolase
	ClaHMA8	Cla97C06G122990.2	Zn/Co/Cd/Pb	6	25297328	25304190	+	3660	9	1219	131897	7.06	-0.288	E1-E2_ATPase:Hydrolase
	ClaHMA9	Cla97C10G192420.2	Ag/Cu	10	18859213	18884430	-	3996	24	994	107060	6.22	0.147	HMA:E1-E2_ATPase:Hydrolase
	ClaHMA10	Cla97C11G217860.1	Zn/Co/Cd/Pb	11	23260818	23269101	-	2592	9	863	94238	7.78	-0.037	HMA:E1-E2_ATPase:Hydrolase
Citrullus mucosospermus	CmuHMA1	CmUC01G002850.1	Zn/Co/Cd/Pb	1	2669458	2676905	-	2916	6	971	105474	6.28147	0.171473	HMA:HMA:HMA:E1-E2_ATPase:Hydrolase
	CmuHMA2	CmUC01G025220.1	Ag/Cu	1	36556742	36567448	-	3024	9	1007	108224	5.11479	0.306058	HMA:HMA:E1-E2_ATPase:Hydrolase
	CmuHMA3	CmUC02G033530.1	Zn/Co/Cd/Pb	2	8488912	8498186	+	2502	13	833	89497.4	8.29175	0.108884	E1-E2_ATPase:Hydrolase
	CmuHMA4	CmUC02G034080.1	Zn/Co/Cd/Pb	2	9759834	9784999	-	2616	15	871	93881.3	7.64339	0.0801378	E1-E2_ATPase:Hydrolase
	CmuHMA5	CmUC04G071860.1	Ag/Cu	4	16586763	16592562	+	2946	6	981	106320	6.03837	0.187666	HMA:HMA:HMA:E1-E2_ATPase:Hydrolase
	CmuHMA6	CmUC05G096720.1	Ag/Cu	5	25963455	25972790	+	2697	17	898	96011	5.99688	0.165479	HMA:E1-E2_ATPase:Hydrolase
	CmuHMA7	CmUC06G121920.1	Zn/Co/Cd/Pb	6	25488523	25495382	+	3660	9	1219	131849	7.12928	-0.291222	E1-E2_ATPase:Hydrolase
	CmuHMA8	CmUC10G190880.1	Ag/Cu	10	19019211	19044426	-	3996	25	1331	143551	6.27613	0.090308	HMA:E1-E2_ATPase:Hydrolase
	CmuHMA9	CmUC11G215550.1	Zn/Co/Cd/Pb	11	23231270	23241464	-	2595	9	864	94359.1	7.60434	-0.043287	HMA:E1-E2_ATPase:Hydrolase
Cucumis melo	CmeHMA1	MELO3C017438.2	Zn/Co/Cd/Pb	2	23202305	23207402	+	3372	6	1123	121578	6.59	-0.372	E1-E2_ATPase:Hydrolase
	CmeHMA2	MELO3C003996.2	Zn/Co/Cd/Pb	5	22206927	22213747	-	2646	6	881	96551.7	8.02	-0.066	E1-E2_ATPase:Hydrolase
	CmeHMA3	MELO3C016915.2	Ag/Cu	7	1156688	1166811	-	2697	17	898	96064.3	6.03	0.183	HMA:E1-E2_ATPase:Hydrolase
	CmeHMA4	MELO3C019011.2	Ag/Cu	7	15470746	15474024	+	1878	17	625	66441.6	9.23	0.146	HMA:E1-E2_ATPase:Hydrolase
	CmeHMA5	MELO3C007027.2	Ag/Cu	8	294487	300543	+	2175	8	724	77915.4	5.38	0.339	HMA:HMA:E1-E2_ATPase:Hydrolase
	CmeHMA6	MELO3C008846.2	Ag/Cu	8	24343751	24349542	-	2946	3	981	106328	6.09	0.173	HMA:HMA:HMA:E1-E2_ATPase:Hydrolase
	CmeHMA7	MELO3C005665.2	Ag/Cu	9	22014667	22020617	+	2922	6	973	105896	6.53	0.153	HMA:HMA:HMA:E1-E2_ATPase:Hydrolase
	CmeHMA8	MELO3C020853.2	Ag/Cu	11	3550683	3561711	-	2622	6	874	94677.4	8.62	0.258	E1-E2_ATPase:Hydrolase
	CmeHMA9	MELO3C024722.2	Zn/Co/Cd/Pb	11	7094695	7105295	+	2472	13	823	88699.4	7.24	0.13	E1-E2_ATPase superfamily:Hydrolase
	CmeHMA10	MELO3C024800.2	Zn/Co/Cd/Pb	11	8588898	8600043	-	2472	13	823	88601.2	8.07	0.147	E1-E2_ATPase:Hydrolase
Cucumis sativus	CsaHMA1	CsaV3_1G031800.1	Zn/Co/Cd/Pb	1	18849770	18856924	+	3696	9	1231	133280	6.78131	-0.32169	HMA:E1-E2_ATPase:Hydrolase
	CsaHMA2	CsaV3_2G008620.1	Zn/Co/Cd/Pb	2	4969020	4975670	+	2667	9	888	97429.4	6.81104	-0.0943694	E1-E2_ATPase:Hydrolase
	CsaHMA3	CsaV3_2G016430.1	Ag/Cu	2	13698624	13712497	+	2754	9	917	100150	8.6195	0.208724	E1-E2_ATPase:Hydrolase
	CsaHMA4	CsaV3_2G036100.1	Zn/Co/Cd/Pb	2	24267123	24277826	-	2472	13	823	88512.1	7.43189	0.133779	E1-E2_ATPase:Hydrolase
	CsaHMA5	CsaV3_4G009440.1	Ag/Cu	4	7062141	7109723	-	2802	17	933	99026.8	8.77571	0.141265	HMA:E1-E2_ATPase:Hydrolase
	CsaHMA6	CsaV3_4G012010.1	Ag/Cu	4	9299082	9308750	-	2946	6	981	106470	6.13858	0.168502	HMA:HMA:E1-E2_ATPase:Hydrolase
	CsaHMA7	CsaV3_4G036070.1	Ag/Cu	4	25345754	25355394	+	2697	17	898	96148.3	6.16342	0.185746	HMA:E1-E2_ATPase:Hydrolase
	CsaHMA8	CsaV3_5G002910.1	Ag/Cu	5	1823864	1829914	-	2922	6	973	105925	6.08197	0.18037	HMA:HMA:HMA:E1-E2_ATPase:Hydrolase
	CsaHMA9	CsaV3_6G052820.1	Ag/Cu	6	30800528	30807117	-	3024	9	1007	108233	5.12	0.311	HMA:HMA:E1-E2_ATPase:Hydrolase
Cucurbita maxima	CmaHMA1	CmaCh02G004720.1	Zn/Co/Cd/Pb	2	2473800	2483447	+	2391	13	796	85374.8	7.40694	0.169095	E1-E2_ATPase:Hydrolase
	CmaHMA2	CmaCh02G004930.1	Zn/Co/Cd/Pb	2	2627161	2640512	-	2454	13	817	87921.5	7.64703	0.166952	E1-E2_ATPase:Hydrolase
	CmaHMA3	CmaCh02G005200.1	Ag/Cu	2	2852337	2859551	-	2697	8	898	97265	8.55033	0.237194	E1-E2_ATPase:Hydrolase
	CmaHMA4	CmaCh02G014620.1	Ag/Cu	2	8390166	8394571	-	2940	5	979	106273	5.99699	0.17855	HMA:HMA:HMA:E1-E2_ATPase:Hydrolase
	CmaHMA5	CmaCh03G002220.1	Ag/Cu	3	3337382	3342996	-	2946	6	981	106717	6.1961	0.17105	HMA:HMA:HMA:E1-E2_ATPase:Hydrolase
	CmaHMA6	CmaCh03G014840.1	Ag/Cu	3	9239119	9245661	-	3027	9	1008	108106	4.9644	0.31994	HMA:HMA:E1-E2_ATPase:Hydrolase
	CmaHMA7	CmaCh05G007060.1	Zn/Co/Cd/Pb	5	3727040	3737148	+	2997	14	998	107697	6.72743	0.0728457	E1-E2_ATPase:Hydrolase:Med22
	CmaHMA8	CmaCh05G007080.1	Zn/Co/Cd/Pb	5	3753976	3757962	-	2454	10	817	88345	6.7089	0.0432069	E1-E2_ATPase:Hydrolase
	CmaHMA9	CmaCh07G000300.1	Ag/Cu	7	191702	196349	+	3018	9	1005	107544	5.17607	0.317413	HMA:HMA:E1-E2_ATPase:Hydrolase
	CmaHMA10	CmaCh07G011420.1	Ag/Cu	7	6242112	6247658	-	2946	6	981	106806	5.78288	0.20999	HMA:HMA:HMA:E1-E2_ATPase:Hydrolase
	CmaHMA11	CmaCh09G003660.1	Ag/Cu	9	1514178	1523998	+	2928	19	975	105169	6.46949	0.121744	HMA:E1-E2_ATPase:Hydrolase
	CmaHMA12	CmaCh10G003840.1	Zn/Co/Cd/Pb	10	1763343	1769201	-	3711	9	1236	134534	6.52451	-0.375485	E1-E2_ATPase:Hydrolase
Cucurbita moschata	CmoHMA1	CmoCh02G004770.1	Zn/Co/Cd/Pb	2	2601591	2611671	+	2415	13	804	86168.5	7.19305	0.170522	E1-E2_ATPase:Hydrolase
	CmoHMA2	CmoCh02G005080.1	Zn/Co/Cd/Pb	2	2797137	2810186	-	2475	14	824	88334	7.439	0.174272	E1-E2_ATPase:Hydrolase
	CmoHMA3	CmoCh02G005310.1	Ag/Cu	2	3007937	3013832	-	2676	8	891	96524.2	8.47381	0.246801	E1-E2_ATPase:Hydrolase
	CmoHMA4	CmoCh02G014970.1	Ag/Cu	2	8752694	8757356	-	2937	5	978	105939	6.20838	0.181186	HMA:HMA:HMA:E1-E2_ATPase:Hydrolase
	CmoHMA5	CmoCh03G002340.1	Ag/Cu	3	3602692	3608443	-	2946	6	981	106617	5.77759	0.176758	HMA:HMA:HMA:E1-E2_ATPase:Hydrolase
	CmoHMA6	CmoCh03G014860.1	Ag/Cu	3	10644182	10650513	-	3033	9	1010	108299	5.14236	0.342277	HMA:HMA:E1-E2_ATPase:Hydrolase
	CmoHMA7	CmoCh05G007420.1	Zn/Co/Cd/Pb	5	3902126	3907001	+	2412	10	803	87137	8.05173	0.0277709	E1-E2_ATPase:Hydrolase
	CmoHMA8	CmoCh05G007450.1	Zn/Co/Cd/Pb	5	3933660	3938163	-	2475	9	824	89144.4	7.5774	0.0438107	E1-E2_ATPase:Hydrolase
	CmoHMA9	CmoCh07G000320.1	Ag/Cu	7	204486	209517	+	3018	9	1005	107651	5.21017	0.311741	HMA:HMA:E1-E2_ATPase:Hydrolase
	CmoHMA10	CmoCh07G011900.1	Ag/Cu	7	6446516	6452467	-	2955	6	984	107248	6.19343	0.184451	HMA:HMA:HMA:E1-E2_ATPase:Hydrolase
	CmoHMA11	CmoCh09G003650.1	Ag/Cu	9	1585811	1595548	+	2697	17	898	96120.2	6.09868	0.162138	HMA:E1-E2_ATPase:Hydrolase
	CmoHMA12	CmoCh10G004120.1	Zn/Co/Cd/Pb	10	1870225	1876197	-	3735	9	1244	135673	6.32961	-0.386013	E1-E2_ATPase:Hydrolase
Cucurbita pepo	CpeHMA1	Cp4.1LG00g07400.1	Ag/Cu	0	24223583	24227843	+	2940	5	979	106025	6.28	0.194	HMA:HMA:HMA:E1-E2_ATPase:Hydrolase
	CpeHMA2	Cp4.1LG05g03530.1	Ag/Cu	5	1821319	1825901	+	2940	5	979	105981	6.21	0.188	HMA:HMA:HMA:E1-E2_ATPase:Hydrolase
	CpeHMA3	Cp4.1LG05g11630.1	Ag/Cu	5	7875287	7880804	+	2523	7	840	90826.9	8.83	0.274	E1-E2_ATPase:Hydrolase
	CpeHMA4	Cp4.1LG05g11820.1	Zn/Co/Cd/Pb	5	8092436	8108195	+	2358	12	785	84458.6	6.98	0.128	E1-E2_ATPase:Hydrolase
	CpeHMA5	Cp4.1LG05g11960.1	Zn/Co/Cd/Pb	5	8285892	8295884	-	2418	13	805	86327.7	8.01	0.157	E1-E2_ATPase superfamily:Hydrolase
	CpeHMA6	Cp4.1LG06g02620.1	Ag/Cu	6	1392701	1402986	+	2424	13	807	87132.4	7.96	0.141	HMA:E1-E2_ATPase:Hydrolase
	CpeHMA7	Cp4.1LG10g06760.1	Ag/Cu	10	158888	165325	+	3027	9	1008	108147	5.03	0.314	HMA:HMA:E1-E2_ATPase:Hydrolase
	CpeHMA8	Cp4.1LG10g10980.1	Ag/Cu	10	6338078	6343743	+	3000	6	999	108391	5.95	0.167	HMA:HMA:HMA:E1-E2_ATPase:Hydrolase
	CpeHMA9	Cp4.1LG11g06220.1	Zn/Co/Cd/Pb	11	3953260	3957604	+	2109	9	703	75221.6	8.23	0.419	E1-E2_ATPase superfamily:Hydrolase
	CpeHMA10	Cp4.1LG11g06250.1	Zn/Co/Cd/Pb	11	3984038	3989170	-	1071	5	356	37791.1	6.89	0.292	E1-E2_ATPase superfamily:Hydrolase
	CpeHMA11	Cp4.1LG14g05090.1	Ag/Cu	14	1185043	1199175	+	2838	18	945	100858	9.34	0.085	HMA:E1-E2_ATPase:Hydrolase
	CpeHMA12	Cp4.1LG18g06320.1	Zn/Co/Cd/Pb	18	6534383	6539588	+	3177	10	1058	115249	6.18	-0.27	E1-E2_ATPase:Hydrolase
	CpeHMA13	Cp4.1LG19g02120.1	Ag/Cu	19	1745088	1751035	+	2946	6	981	106781	6.62	0.199	HMA:HMA:HMA:E1-E2_ATPase:Hydrolase
	CpeHMA14	Cp4.1LG19g05470.1	Ag/Cu	19	8043954	8049755	-	3087	8	1028	110142	5.21	0.328	HMA:HMA:E1-E2_ATPase:Hydrolase
Lagenaria siceraria	LsiHMA1	Lsi01G000380.1	Ag/Cu	1	431400	438193	+	2364	11	1087	117407	5.16498	0.31104	HMA:HMA:E1-E2_ATPase:Hydrolase
	LsiHMA2	Lsi01G016900.1	Ag/Cu	1	15509974	15515773	+	2862	6	953	103416	6.03433	0.173452	HMA:HMA:HMA:E1-E2_ATPase:Hydrolase
	LsiHMA3	Lsi03G009470.1	Ag/Cu	3	18067213	18083234	-	1860	11	619	65319.6	9.02965	0.206624	HMA:E1-E2_ATPase:Hydrolase
	LsiHMA4	Lsi04G013850.1	Ag/Cu	4	21656444	21664316	-	2640	16	879	94022.8	5.99517	0.156314	HMA:E1-E2_ATPase:Hydrolase
	LsiHMA5	Lsi06G011950.1	Zn/Co/Cd/Pb	6	22295824	22304832	+	3756	9	1251	135918	6.63671	-0.33749	HMA:E1-E2_ATPase:Hydrolase
	LsiHMA6	Lsi09G002700.1	Ag/Cu	9	2813136	2836753	-	2925	6	974	105597	5.9975	0.159548	HMA:HMA:HMA:E1-E2_ATPase:Hydrolase
	LsiHMA7	Lsi10G002330.1	Zn/Co/Cd/Pb	10	3799223	3809540	-	2481	13	826	89035.8	8.0193	0.115738	E1-E2_ATPase:Hydrolase
	LsiHMA8	Lsi11G007790.1	Zn/Co/Cd/Pb	11	8958115	8970025	+	2700	10	899	98778.7	6.70981	-0.0823137	E1-E2_ATPase:Hydrolase

## Sheet: Table S3
Table S3. Common Conserved Motifs Present in HMA Family in Cucurbit species
Commun motifs in Cucurbit species
#Motif	Length (aa)	Sequence MEME	Sequence MAST	Function	Prosite ID
1	50	AIGAGTDJAIEAADIVLMRNBJSDVPTAIDLSRKTFSRVRQNYIWAJGYN	AIGAGTDJAIEAADIVLMRNBJSDVPTAIDLSRKTFSRVRQNYIWAJGYN	Casein kinase II phosphorylation site.	PS00006
2	41	PTAVMVATGVGASKGVLIKGGDALERAAKVKCVAFDKTGTL	PTAVMVATGVGASKGVLIKGGDALERAAKVKCVAFDKTGTL	N-myristoylation site	PS00008
3	50	VIGGTINLNGVLHVKATKVGSESVLSQIVRLVEEAQLNKAPIQRFADEIA	VIGGTINLNGVLHVKATKVGSESVLSQIVRLVEEAQLNKAPIQRFADEIA	N-myristoylation site	PS00008
4	50	EEEIDARLIQVGDVJKVLPGEKVPVDGIVVWGSSHVBESMJTGESKPVAK	EEEIDARLIQVGDVJKVLPGEKVPVDGIVVWGSSHVBESMJTGESKPVAK	E1-E2_ATPase	PS00154
5	29	NLQKDGGTVAMVGDGINDAPALAAADVGI	NLQKDGGTVAMVGDGINDAPALAAADVGI	N-myristoylation site	PS00008
6	41	VQFIIGRRFYIDAYKALRKGSANMDVLVALGTNAAYFYSVY	VQFIIGRRFYIDAYKALRKGSANMDVLVALGTNAAYFYSVY	cAMP- and cGMP-dependent protein kinase phosphorylation site	PS00004
7	42	AIPIAAGVLFPSTGFRLPPWJAGAAMAASSVSVVCSSLLLKY	AIPIAAGVLFPSTGFRLPPWJAGAAMAASSVSVVCSSLLLKY	N-myristoylation site	PS00008
8	29	SSGDSFELALQFAJSVLVIACPCALGLAT	SSGDSFELALQFAJSVLVIACPCALGLAT	Casein kinase II phosphorylation site.	PS00006
9	29	ELLKLVAAIESNSEHPIAKAIVEHAKSFK	ELLKLVAAIESNSEHPIAKAIVEHAKSFK	Casein kinase II phosphorylation site.	PS00006
10	29	SAMLITFVLLGKYLEVRAKGKASDAIAKL	SAMLITFVLLGKYLEVRAKGKASDAIAKL	E1-E2_ATPase	PS00154

## Sheet: Table S4
Table S4. Common putative cis-elements identified in the promoter sequences of HMA proteins genes in Cucurbit species.
Cis-regulatory element	Expression pattern	Signal sequence
3-AF1 binding site	light responsive element	TAAGAGAGGAA
AAGAA-motif	binding site in many light-regulated gene	GAAAGAA
ABRE	cis-acting element involved in the abscisic acid responsiveness	ACGTG
ABRE4	early responsive to dehydration	CACGTA
ACE	cis-acting element involved in light responsiveness	CTAACGTATT
AE-box	part of a module for light response	AGAAACAA
AP-1	cis-acting element for proline	TGAGTTAG
ARE	cis-acting regulatory element essential for the anaerobic induction	AAACCA
as-1	transcriptional activation of several genes by auxin and/or salicylic acid; May be relevant to light regulation	TGACG
AT~TATA-box	Critical for accurate initiation of transcription	TATATA
AT1-motif	part of a light responsive module	AATTATTTTTTATT
ATCT-motif	part of a conserved DNA module involved in light responsiveness	AATCTAATCC
AT-rich element	binding site of AT-rich DNA binding protein (ATBP-1)	ATAGAAATCAA
AT-rich sequence	element for maximal elicitor-mediated activation (2copies)	TAAAATACT
AuxRR-core	cis-acting regulatory element involved in auxin responsiveness	GGTCCAT
Box 4	part of a conserved DNA module involved in light responsiveness	ATTAAT
Box II	part of a light responsive element	TGGTAATAA
Box III	protein binding site	ATCATTTTCACT
CAAT-box	common cis-acting element in promoter and enhancer regions	CAAAT
CAT-box	cis-acting regulatory element related to meristem expression	GCCACT
CCAAT-box	MYBHv1 binding site	CAACGG
CGTCA-motif	cis-acting regulatory element involved in the MeJA-responsiveness	CGTCA
chs-CMA1a	part of a light responsive element	TTACTTAA
circadian	cis-acting regulatory element involved in circadian control	CAAAGATATC
DRE1	expressed during late embryogenesis, induced by ABA	ACCGAGA
ERE	ethylene-induced activation	ATTTTAAA
GA-motif	part of a light responsive element	ATAGATAA
Gap-box	part of a light responsive element	CAAATGAAGA
GARE-motif	gibberellin-responsive element	TCTGTTG
GATA-motif	part of a light responsive element	AAGGATAAGG
G-box	cis-acting regulatory element involved in light responsiveness	CAGACGTGGCA
GCN4_motif	cis-regulatory element involved in endosperm expression	TGAGTCA
GT1-motif	light responsive element	GGTTAA
H-box	Essential for both light regulation and elicitor induction	CCTACCNNNNNNNCTNNNNA
HD-Zip 1	element involved in differentiation of the palisade mesophyll cells	CAATAATTG
I-box	part of a light responsive element	TGATAATGT
LAMP-element	part of a light responsive element	CTTTATCA
L-box	part of a light responsive element	ATCCCACCTAC
LTR	cis-acting element involved in low-temperature responsiveness	CCGAAA
MBS	MYB binding site involved in drought-inducibility	CAACTG
MBSI	MYB binding site involved in flavonoid biosynthetic genes regulation	TTTTTACGGTTA
MRE	MYB binding site involved in light responsiveness	AACCTAA
MYB	Involved in regulation of genes that are responsive to water stress	CAACAG
MYB recognition site	Involved in regulation of genes that are responsive to water stress	CCGTTG
Myb-binding site	gibberellin-responsive element	CAACAG
MYB-like sequence	Involved in regulation of genes that are responsive to water stress	TAACCA
MYC	Related to cold and dehydration responsiveness	CAATTG
O2-site	cis-acting regulatory element involved in zein metabolism regulation	GATGACATGG
P-box	gibberellin-responsive element	CCTTTTG
Sp1	light responsive element	GGGCGG
TATA	core promoter element around -30 of transcription start	TATAAAAT
TATA-box	core promoter element around -30 of transcription start	ATATAT
TATC-box	cis-acting element involved in gibberellin-responsiveness	TATCCCA
TCA	cis-acting element involved in salicylic acid responsiveness	TCATCTTCAT
TCA-element	cis-acting element involved in salicylic acid responsiveness	CCATCTTTTT
TCCC-motif	characteristic of the promoters activated in infected cells DE of root nodules	TCTCCCT
TC-rich repeats	cis-acting element involved in defense and stress responsiveness	GTTTTCTTAC
TCT-motif	part of a light responsive element	TCTTAC
TGACG-motif	cis-acting regulatory element involved in the MeJA-responsiveness	TGACG
TGA-element	auxin-responsive element	AACGAC
W box	involved in elicitor-responsive transcription of defense genes	TTGACC
WRE3	RRE (R response element)	CCACCT

## Sheet: Table S5
Table S5. Gene ontology annotation results of HMA genes in Cucurbit species
Gene ontology		Cellular component	Molecular function								Biological process
Species	Gene	membrane	ATP hydrolyis activity	ATP binding	ATPase-coupled cation transmembrane transporter activity	metal ion binding	copper ion binding	P-type divalent copper transporter activity	cadmium ion transmembrane transporter activity	zinc ion transmembrane transporter activity	copper ion homeostasis	copper ion transmembrane transport	cation transmembrane transport	zinc ion transmembrane transport	cadmium ion transmembrane transport
Citrullus amarus	CamHMA1	1	1	1			1	1			1	1
	CamHMA2	1	1	1	1	1							1
	CamHMA3	1	1	1			1	1			1	1
	CamHMA4	1	1	1	1	1							1
	CamHMA5	1	1	1	1	1							1
	CamHMA6	1	1	1			1	1			1	1
	CamHMA7	1	1	1			1	1			1	1
	CamHMA8	1	1	1	1	1			1	1				1	1
	CamHMA9	1	1	1	1	1							1
	CamHMA10	1	1	1	1	1							1
Citrullus colocynthis	CcoHMA1	1	1	1			1	1			1	1
	CcoHMA2	1	1	1	1	1							1
	CcoHMA3	1	1	1	1	1							1
	CcoHMA4	1	1	1			1	1			1	1
	CcoHMA5	1	1	1			1	1			1	1
	CcoHMA6	1	1	1			1	1			1	1
	CcoHMA7	1	1	1	1	1			1	1				1	1
	CcoHMA8	1	1	1	1	1							1
	CcoHMA9	1	1	1	1	1							1
Citrullus lanatus	ClaHMA1	1	1	1			1	1			1	1
	ClaHMA2	1	1	1			1	1			1	1
	ClaHMA3	1	1	1	1	1							1
	ClaHMA4	1	1	1	1	1							1
	ClaHMA5	1	1	1			1	1			1	1
	ClaHMA6	1	1	1			1	1			1	1
	ClaHMA7	1	1	1			1	1			1	1
	ClaHMA8	1	1	1	1	1			1	1				1	1
	ClaHMA9	1	1	1	1	1							1
	ClaHMA10	1	1	1	1	1							1
Citrullus mucusospermus	CmuHMA1	1	1	1			1	1			1	1
	CmuHMA2	1	1	1			1	1			1	1
	CmuHMA3	1	1	1	1	1							1
	CmuHMA4	1	1	1	1	1							1
	CmuHMA5	1	1	1			1	1			1	1
	CmuHMA6	1	1	1			1	1			1	1
	CmuHMA7	1	1	1	1	1			1	1				1	1
	CmuHMA8	1	1	1			1	1			1	1
	CmuHMA9	1	1	1	1	1							1
Cucumis melo	CmeHMA1	1	1	1	1	1			1	1				1	1
	CmeHMA2	1	1	1	1	1					1	1	1
	CmeHMA3	1	1	1			1	1			1	1
	CmeHMA4	1	1	1
	CmeHMA5	1	1	1			1	1			1	1
	CmeHMA6	1	1	1			1	1			1	1
	CmeHMA7	1	1	1			1	1			1	1
	CmeHMA8	1	1	1	1	1	1	1					1
	CmeHMA9	1	1	1	1	1							1
	CmeHMA10	1	1	1	1	1							1
Cucumis sativus	CsaHMA1	1	1	1	1	1			1	1				1	1
	CsaHMA2	1	1	1	1	1					1	1	1
	CsaHMA3	1	1	1			1	1			1	1
	CsaHMA4	1	1	1	1	1							1
	CsaHMA5	1	1	1			1	1			1	1
	CsaHMA6	1	1	1			1	1			1	1
	CsaHMA7	1	1	1			1	1			1	1
	CsaHMA8	1	1	1			1	1			1	1
	CsaHMA9	1	1	1			1	1			1	1
Cucurbita maxima	CmaHMA1	1	1	1	1	1							1
	CmaHMA2	1	1	1	1		1						1
	CmaHMA3	1	1	1	1		1						1
	CmaHMA4	1	1	1	1								1
	CmaHMA5	1	1	1		1		1			1	1
	CmaHMA6	1	1	1		1		1			1	1
	CmaHMA7	1	1	1	1	1	1		1	1				1	1
	CmaHMA8	1	1	1	1	1	1	1					1
	CmaHMA9	1	1	1		1		1			1	1
	CmaHMA10	1	1	1		1		1			1	1
	CmaHMA11	1	1	1							1	1
	CmaHMA12	1	1	1	1	1	1	1					1
Cucurbita moschata	CmoHMA1	1	1	1	1	1							1
	CmoHMA2	1	1	1	1		1						1
	CmoHMA3	1	1	1	1		1						1
	CmoHMA4	1	1	1	1								1
	CmoHMA5	1	1	1		1		1			1	1
	CmoHMA6	1	1	1		1		1			1	1
	CmoHMA7	1	1	1	1	1	1		1	1				1	1
	CmoHMA8	1	1	1	1	1	1	1					1
	CmoHMA9	1	1	1		1		1			1	1
	CmoHMA10	1	1	1		1		1			1	1
	CmoHMA11	1	1	1							1	1
	CmoHMA12	1	1	1	1	1	1	1					1
Cucurbita pepo	CpeHMA1	1	1	1	1								1
	CpeHMA2	1	1	1		1		1			1	1
	CpeHMA3	1	1	1	1	1							1
	CpeHMA4	1	1	1	1		1						1
	CpeHMA5	1	1	1	1		1						1
	CpeHMA6	1	1	1							1	1
	CpeHMA7	1	1	1		1		1			1	1
	CpeHMA8	1	1	1		1		1			1	1
	CpeHMA9	1	1	1	1	1	1	1					1
	CpeHMA10	1	1	1	1		1						1
	CpeHMA11	1	1	1	1		1						1
	CpeHMA12	1	1	1	1	1	1		1	1				1	1
	CpeHMA13	1	1	1		1		1			1	1
	CpeHMA14	1	1	1		1		1			1	1
Lagenaria siceraria	LsiHMA1	1	1	1			1	1			1	1
	LsiHMA2	1	1	1			1	1			1	1
	LsiHMA3	1	1	1			1	1			1	1
	LsiHMA4	1	1	1			1	1			1	1
	LsiHMA5	1	1	1	1	1			1	1				1	1
	LsiHMA6	1	1	1			1	1			1	1
	LsiHMA7	1	1	1	1	1							1
	LsiHMA8	1	1	1	1	1							1
1 = Count, 0 = no Count

## Sheet: Table S6
Table S6. Normalized RNA-seq data from C. pepo under Cu stress
Gene	ROOT CuO NPs	ROOT CuO bulk	ROOT CuSO4	LEAF CuO NPs	LEAF CuO bulk	LEAF CuSO4	POLLEN CuO NPs	POLLEN CuO bulk	POLLEN CuSO4
CpeHMA10	0.978	-0.17	0.353	0	0.395	0	0	0	0
CpeHMA9	3.187	-0.611	1.768	-0.116	0.66	-0.3	0	0	0
CpeHMA12	7.304	-61.171	-32.941	13.294	-5.09	0.823	-0.034	2.459	4.461
CpeHMA5	1.128	-2.462	-0.312	-4.127	-13.28	-14.392	0.246	0.101	-0.291
CpeHMA4	2.298	-0.319	1.031	0.104	2.14	3.27	0.474	-0.247	-0.565
CpeHMA6	0.899	0.596	1.186	0.202	5.039	19.567	0	0.144	0.172
CpeHMA3	-0.606	-0.041	-0.751	-0.051	-1.215	-0.762	5.057	1.57	-0.032
CpeHMA7	4.536	2.709	21.72	-0.199	-1.237	-1.238	3.057	0.433	3.587
CpeHMA14	19.126	-10.655	32.071	-1.093	-5.111	-8.628	0.327	0.68	2.248
CpeHMA1	0	1.694	3.935	-2.374	-2.374	-0.917	0	0	0
CpeHMA2	3.516	0.293	3.367	-1.107	-2.311	-1.275	0	0	0
CpeHMA13	0.839	0.311	0.382	0.172	0.077	-0.13	-0.052	-0.052	-0.052
CpeHMA8	3.799	14.885	4.616	0.075	0.408	1.464	6.26	3.33	-2.613
CpeHMA11	0.004	-0.767	-3.502	-0.346	-6.745	-6.783	0.486	0.595	0.439
